# Supplementary material for: Identification of Borrelia Species after Creation of an In-House MALDI-TOF MS Database
Source: PubMed Central journal article supplement (PMC3923052; doi:10.1371/journal.pone.0088895), 2014-02-12
Supplement: pone.0088895.s001.pdf [file pone.0088895.s001.pdf]

## MALDI Biotyper MSP Peak List Editor. Version: 3.1.66.0

*Borrelia afzelii* strain 103469

| m/z [Da] | Intensity [%] | Weight [%] | Frequency [%] |
|----------|---------------|------------|---------------|
| 3087,73  | 65,64         | 100,00     | 100,0         |
| 3165,25  | 7,06          | 100,00     | 83,3          |
| 3313,86  | 18,48         | 100,00     | 100,0         |
| 3365,63  | 14,28         | 100,00     | 100,0         |
| 3384,47  | 28,23         | 100,00     | 100,0         |
| 3511,26  | 14,90         | 100,00     | 100,0         |
| 3544,26  | 8,00          | 100,00     | 76,7          |
| 3602,25  | 5,58          | 100,00     | 67,7          |
| 3795,90  | 49,80         | 100,00     | 96,7          |
| 3848,27  | 25,84         | 100,00     | 100,0         |
| 3875,44  | 40,24         | 100,00     | 86,7          |
| 3888,77  | 66,91         | 100,00     | 100,0         |
| 4005,72  | 24,66         | 100,00     | 100,0         |
| 4022,37  | 14,08         | 100,00     | 93,3          |
| 4057,09  | 5,03          | 100,00     | 66,7          |
| 4239,37  | 16,36         | 100,00     | 100,0         |
| 4290,67  | 40,17         | 100,00     | 100,0         |
| 4308,17  | 20,18         | 100,00     | 63,3          |
| 4376,72  | 89,65         | 100,00     | 100,0         |
| 4397,78  | 10,25         | 100,00     | 93,3          |
| 4530,94  | 9,97          | 100,00     | 66,6          |
| 4555,47  | 11,08         | 100,00     | 100,0         |
| 4615,63  | 15,59         | 100,00     | 80,0          |
| 4636,91  | 37,61         | 100,00     | 100,0         |
| 4797,79  | 5,57          | 100,00     | 63,3          |
| 4818,86  | 26,19         | 100,00     | 100,0         |
| 4875,99  | 13,49         | 100,00     | 96,7          |
| 4971,88  | 78,02         | 100,00     | 100,0         |
| 5048,20  | 67,35         | 100,00     | 100,0         |
| 4136,26  | 6,31          | 100,00     | 63,3          |
| 5569,12  | 23,89         | 100,00     | 76,7          |
| 5813,87  | 23,95         | 100,00     | 100,0         |
| 5884,36  | 7,12          | 100,00     | 70,0          |
| 6100,54  | 4,25          | 100,00     | 66,7          |
| 6144,50  | 21,68         | 100,00     | 90,0          |
| 6174,11  | 97,66         | 100,00     | 100,0         |
| 6224,18  | 11,73         | 100,00     | 83,3          |
| 6512,99  | 9,24          | 100,00     | 66,7          |
| 6769,16  | 45,00         | 100,00     | 100,0         |
| 6833,52  | 24,10         | 100,00     | 100,0         |
| 6959,60  | 15,56         | 100,00     | 96,7          |
| 7014,09  | 21,52         | 100,00     | 100,0         |
| 7043,89  | 10,74         | 100,00     | 96,7          |
| 7196,29  | 8,63          | 100,00     | 70,0          |
| 7716,60  | 15,91         | 100,00     | 96,7          |
| 7740,36  | 30,01         | 100,00     | 100,0         |
| 7868,69  | 3,95          | 100,00     | 63,3          |
| 7946,05  | 10,06         | 100,00     | 96,7          |
| 8007,77  | 27,52         | 100,00     | 100,0         |
| 8043,71  | 16,50         | 100,00     | 100,0         |
| 8112,87  | 5,45          | 100,00     | 63,3          |

**MALDI Biotyper MSP Peak List Editor. Version: 3.1.66.0*****Borrelia afzelii* strain 103469**

| <b>m/z [Da]</b> | <b>Intensity [%]</b> | <b>Weight [%]</b> | <b>Frequency [%]</b> |
|-----------------|----------------------|-------------------|----------------------|
| 8203,69         | 6,29                 | 100,00            | 76,7                 |
| 8475,52         | 20,53                | 100,00            | 100,0                |
| 8548,03         | 9,96                 | 100,00            | 93,3                 |
| 8576,97         | 30,85                | 100,00            | 100,0                |
| 8610,81         | 10,22                | 100,00            | 100,0                |
| 8788,40         | 8,55                 | 100,00            | 70,0                 |
| 9239,96         | 12,51                | 100,00            | 90,0                 |
| 9267,89         | 22,85                | 100,00            | 100,0                |
| 9662,25         | 4,96                 | 100,00            | 66,7                 |
| 9746,20         | 10,67                | 100,00            | 93,3                 |
| 9902,94         | 16,29                | 100,00            | 70,0                 |
| 9937,87         | 44,69                | 100,00            | 100,0                |
| 10012,75        | 10,74                | 100,00            | 97,7                 |
| 10092,79        | 40,89                | 100,00            | 100,0                |
| 10162,59        | 5,80                 | 100,00            | 73,3                 |
| 11620,88        | 9,78                 | 100,00            | 73,3                 |
| 13623,94        | 7,90                 | 100,00            | 73,3                 |
| 13661,41        | 13,54                | 100,00            | 96,7                 |
| 13910,58        | 4,94                 | 100,00            | 63,3                 |

## MALDI Biotyper MSP Peak List Editor. Version: 3.1.66.0

*Borrelia burgdorferi* strain B31

| m/z [Da] | Intensity [%] | Weight [%] | Frequency [%] |
|----------|---------------|------------|---------------|
| 3097,87  | 49,37         | 100,00     | 100,0         |
| 3136,09  | 12,06         | 100,00     | 100,0         |
| 3172,29  | 7,80          | 100,00     | 100,0         |
| 3263,67  | 4,02          | 100,00     | 91,7          |
| 3316,51  | 9,66          | 100,00     | 100,0         |
| 3384,98  | 22,30         | 100,00     | 100,0         |
| 3408,27  | 6,35          | 100,00     | 100,0         |
| 3450,47  | 4,87          | 100,00     | 91,7          |
| 3472,60  | 16,60         | 100,00     | 100,0         |
| 3537,50  | 12,95         | 100,00     | 100,0         |
| 3628,96  | 2,14          | 100,00     | 83,3          |
| 3796,04  | 45,63         | 100,00     | 95,8          |
| 3844,04  | 26,84         | 100,00     | 100,0         |
| 3889,79  | 8,86          | 100,00     | 100,0         |
| 4007,15  | 17,76         | 100,00     | 100,0         |
| 4084,60  | 2,77          | 100,00     | 91,7          |
| 4239,92  | 7,59          | 100,00     | 100,0         |
| 4291,15  | 35,61         | 100,00     | 100,0         |
| 4309,57  | 7,50          | 100,00     | 79,2          |
| 4366,78  | 4,77          | 100,00     | 95,8          |
| 4404,73  | 100,00        | 100,00     | 100,0         |
| 4427,89  | 6,27          | 100,00     | 87,5          |
| 4556,13  | 6,43          | 100,00     | 100,0         |
| 4629,03  | 5,27          | 100,00     | 91,7          |
| 4653,01  | 20,31         | 100,00     | 100,0         |
| 4863,29  | 6,91          | 100,00     | 95,8          |
| 4955,79  | 30,13         | 100,00     | 95,8          |
| 4975,48  | 40,53         | 100,00     | 100,0         |
| 5024,46  | 11,17         | 100,00     | 100,0         |
| 5110,45  | 39,97         | 100,00     | 100,0         |
| 5136,15  | 6,76          | 100,00     | 83,3          |
| 5187,28  | 2,08          | 100,00     | 87,5          |
| 5264,07  | 4,95          | 100,00     | 95,8          |
| 5460,18  | 15,77         | 100,00     | 100,0         |
| 5726,30  | 1,81          | 100,00     | 83,3          |
| 5806,99  | 17,10         | 100,00     | 100,0         |
| 5885,89  | 7,70          | 100,00     | 100,0         |
| 6201,98  | 65,15         | 100,00     | 100,0         |
| 6529,70  | 9,39          | 100,00     | 100,0         |
| 6738,82  | 3,10          | 100,00     | 87,5          |
| 6769,42  | 36,13         | 100,00     | 100,0         |
| 6833,10  | 15,06         | 100,00     | 100,0         |
| 6902,96  | 11,06         | 100,00     | 100,0         |
| 6944,46  | 22,07         | 100,00     | 100,0         |
| 6976,28  | 10,10         | 100,00     | 100,0         |
| 7070,61  | 11,37         | 100,00     | 100,0         |
| 7253,14  | 5,44          | 100,00     | 83,3          |
| 7652,64  | 7,68          | 100,00     | 100,0         |
| 7685,00  | 30,89         | 100,00     | 100,0         |
| 7792,68  | 3,18          | 100,00     | 100,0         |
| 8010,31  | 20,23         | 100,00     | 100,0         |

**MALDI Biotyper MSP Peak List Editor. Version: 3.1.66.0*****Borrelia burgdorferi* strain B31**

| <b>m/z [Da]</b> | <b>Intensity [%]</b> | <b>Weight [%]</b> | <b>Frequency [%]</b> |
|-----------------|----------------------|-------------------|----------------------|
| 8063,67         | 2,87                 | 100,00            | 95,8                 |
| 8347,40         | 2,33                 | 100,00            | 95,8                 |
| 8475,11         | 9,07                 | 100,00            | 100,0                |
| 8542,69         | 6,64                 | 100,00            | 100,0                |
| 8578,51         | 30,32                | 100,00            | 100,0                |
| 8610,04         | 7,06                 | 100,00            | 87,5                 |
| 9255,77         | 5,61                 | 100,00            | 79,2                 |
| 9298,99         | 13,26                | 100,00            | 100,0                |
| 9720,00         | 4,63                 | 100,00            | 95,8                 |
| 9906,39         | 20,45                | 100,00            | 100,0                |
| 9945,51         | 20,30                | 100,00            | 100,0                |
| 10042,62        | 7,19                 | 100,00            | 100,0                |
| 10215,98        | 20,52                | 100,00            | 100,0                |
| 10272,91        | 3,82                 | 100,00            | 83,3                 |
| 11606,18        | 6,79                 | 100,00            | 100,0                |
| 11763,02        | 3,66                 | 100,00            | 91,7                 |
| 13051,40        | 4,19                 | 100,00            | 95,8                 |
| 13657,73        | 3,90                 | 100,00            | 100,0                |
| 13943,70        | 2,98                 | 100,00            | 100,0                |

## MALDI Biotyper MSP Peak List Editor. Version: 3.1.66.0

*Borrelia hermsii* strain HS1

| m/z [Da] | Intensity [%] | Weight [%] | Frequency [%] |
|----------|---------------|------------|---------------|
| 3055,58  | 28,86         | 100,00     | 77,1          |
| 3085,37  | 37,98         | 100,00     | 94,3          |
| 3264,59  | 6,69          | 100,00     | 77,1          |
| 3363,37  | 27,26         | 100,00     | 100,0         |
| 3444,53  | 33,78         | 100,00     | 100,0         |
| 3487,85  | 8,61          | 100,00     | 97,1          |
| 3709,46  | 25,52         | 100,00     | 97,1          |
| 3796,79  | 46,96         | 100,00     | 88,6          |
| 3851,06  | 13,23         | 100,00     | 100,0         |
| 3891,89  | 14,13         | 100,00     | 97,1          |
| 3936,72  | 10,37         | 100,00     | 85,7          |
| 3972,65  | 32,19         | 100,00     | 100,0         |
| 4084,66  | 7,23          | 100,00     | 65,7          |
| 4192,88  | 19,64         | 100,00     | 100,0         |
| 4233,91  | 45,27         | 100,00     | 100,0         |
| 4406,58  | 94,91         | 100,00     | 100,0         |
| 4469,59  | 26,35         | 100,00     | 100,0         |
| 4561,83  | 7,72          | 100,00     | 85,7          |
| 4649,75  | 10,21         | 100,00     | 48,6          |
| 4680,42  | 4,36          | 100,00     | 60,0          |
| 4725,54  | 12,53         | 100,00     | 100,0         |
| 4807,59  | 41,71         | 100,00     | 100,0         |
| 4897,27  | 37,68         | 100,00     | 100,0         |
| 4977,22  | 17,17         | 100,00     | 100,0         |
| 5027,49  | 3,48          | 100,00     | 60,0          |
| 5123,44  | 13,24         | 100,00     | 68,6          |
| 5151,62  | 37,39         | 100,00     | 100,0         |
| 5252,47  | 51,99         | 100,00     | 100,0         |
| 5288,67  | 5,78          | 100,00     | 62,9          |
| 5621,15  | 6,67          | 100,00     | 65,7          |
| 5691,27  | 4,31          | 100,00     | 62,9          |
| 5776,85  | 33,32         | 100,00     | 100,0         |
| 5895,87  | 15,96         | 100,00     | 77,1          |
| 5918,95  | 12,01         | 100,00     | 42,9          |
| 6111,68  | 80,29         | 100,00     | 100,0         |
| 6170,93  | 74,00         | 100,00     | 100,0         |
| 6697,46  | 7,79          | 100,00     | 60,0          |
| 6725,57  | 54,47         | 100,00     | 94,3          |
| 6847,41  | 27,01         | 100,00     | 100,0         |
| 6890,93  | 44,19         | 100,00     | 100,0         |
| 6973,59  | 40,28         | 100,00     | 100,0         |
| 7017,97  | 16,62         | 100,00     | 100,0         |
| 7195,96  | 11,41         | 100,00     | 77,1          |
| 7386,35  | 8,79          | 100,00     | 80,0          |
| 7417,70  | 37,73         | 100,00     | 100,0         |
| 7595,48  | 12,38         | 100,00     | 42,9          |
| 7772,65  | 13,33         | 100,00     | 51,4          |
| 7949,84  | 44,99         | 100,00     | 100,0         |
| 8379,85  | 26,30         | 100,00     | 100,0         |
| 8433,23  | 12,67         | 100,00     | 60,0          |
| 8463,30  | 51,52         | 100,00     | 100,0         |

**MALDI Biotyper MSP Peak List Editor. Version: 3.1.66.0*****Borrelia hermsii* strain HS1**

| <b>m/z [Da]</b> | <b>Intensity [%]</b> | <b>Weight [%]</b> | <b>Frequency [%]</b> |
|-----------------|----------------------|-------------------|----------------------|
| 8613,50         | 5,96                 | 100,00            | 65,7                 |
| 8820,85         | 4,59                 | 100,00            | 62,9                 |
| 8933,87         | 32,43                | 100,00            | 100,0                |
| 9446,54         | 12,74                | 100,00            | 100,0                |
| 9610,70         | 28,34                | 100,00            | 100,0                |
| 9672,50         | 3,00                 | 100,00            | 45,7                 |
| 9789,32         | 24,07                | 100,00            | 100,0                |
| 9924,41         | 6,99                 | 100,00            | 82,9                 |
| 9953,40         | 10,06                | 100,00            | 97,1                 |
| 10097,38        | 4,25                 | 100,00            | 48,6                 |
| 10232,93        | 8,89                 | 100,00            | 62,9                 |
| 10298,89        | 23,95                | 100,00            | 100,0                |
| 11234,80        | 6,87                 | 100,00            | 45,7                 |
| 11376,09        | 2,76                 | 100,00            | 51,4                 |
| 11548,34        | 18,58                | 100,00            | 100,0                |
| 11781,94        | 10,71                | 100,00            | 57,1                 |
| 13676,86        | 8,78                 | 100,00            | 100,0                |
| 13939,00        | 16,08                | 100,00            | 94,3                 |
| 14027,64        | 8,21                 | 100,00            | 88,6                 |

## MALDI Biotyper MSP Peak List Editor. Version: 3.1.66.0

*Borrelia japonica strain F63B*

| m/z [Da] | Intensity [%] | Weight [%] | Frequency [%] |
|----------|---------------|------------|---------------|
| 3056,68  | 35,16         | 100,00     | 100,0         |
| 3083,28  | 58,42         | 100,00     | 100,0         |
| 3162,63  | 49,33         | 100,00     | 100,0         |
| 3261,44  | 3,44          | 100,00     | 100,0         |
| 3300,63  | 9,66          | 100,00     | 100,0         |
| 3384,62  | 37,67         | 100,00     | 100,0         |
| 3419,64  | 14,24         | 100,00     | 94,1          |
| 3472,82  | 25,75         | 100,00     | 100,0         |
| 3547,18  | 11,75         | 100,00     | 100,0         |
| 3795,45  | 52,01         | 100,00     | 100,0         |
| 3843,57  | 35,25         | 100,00     | 100,0         |
| 3890,84  | 18,81         | 100,00     | 100,0         |
| 3911,17  | 7,28          | 100,00     | 82,4          |
| 3936,62  | 3,78          | 100,00     | 100,0         |
| 3969,03  | 4,19          | 100,00     | 94,1          |
| 4006,38  | 21,81         | 100,00     | 100,0         |
| 4172,64  | 3,59          | 100,00     | 100,0         |
| 4238,49  | 8,49          | 100,00     | 100,0         |
| 4296,49  | 39,39         | 100,00     | 100,0         |
| 4376,12  | 95,41         | 100,00     | 100,0         |
| 4439,38  | 9,12          | 100,00     | 100,0         |
| 4555,24  | 9,11          | 100,00     | 100,0         |
| 4622,39  | 26,45         | 100,00     | 100,0         |
| 4653,86  | 3,43          | 100,00     | 94,1          |
| 4724,08  | 3,69          | 100,00     | 88,2          |
| 4893,00  | 12,71         | 100,00     | 100,0         |
| 4952,19  | 40,86         | 100,00     | 100,0         |
| 5083,59  | 8,51          | 100,00     | 100,0         |
| 5124,42  | 44,10         | 100,00     | 88,2          |
| 5434,95  | 47,38         | 100,00     | 100,0         |
| 5459,43  | 5,16          | 100,00     | 82,4          |
| 5499,37  | 2,31          | 100,00     | 88,2          |
| 5602,14  | 3,10          | 100,00     | 82,4          |
| 5716,62  | 3,38          | 100,00     | 100,0         |
| 5785,46  | 22,31         | 100,00     | 100,0         |
| 5840,30  | 4,12          | 100,00     | 100,0         |
| 6120,79  | 70,72         | 100,00     | 100,0         |
| 6166,40  | 96,79         | 100,00     | 100,0         |
| 6519,82  | 24,59         | 100,00     | 100,0         |
| 6736,51  | 5,17          | 100,00     | 100,0         |
| 6767,59  | 51,54         | 100,00     | 100,0         |
| 6830,53  | 16,91         | 100,00     | 100,0         |
| 6909,89  | 16,23         | 100,00     | 100,0         |
| 6943,03  | 27,46         | 100,00     | 100,0         |
| 6986,12  | 3,33          | 100,00     | 94,1          |
| 7089,39  | 5,76          | 100,00     | 100,0         |
| 7651,88  | 7,60          | 100,00     | 94,1          |
| 7682,31  | 30,04         | 100,00     | 100,0         |
| 7797,28  | 4,69          | 100,00     | 100,0         |
| 7876,36  | 2,68          | 100,00     | 100,0         |
| 7951,81  | 3,85          | 100,00     | 100,0         |

**MALDI Biotyper MSP Peak List Editor. Version: 3.1.66.0*****Borrelia japonica strain F63B***

| <b>m/z [Da]</b> | <b>Intensity [%]</b> | <b>Weight [%]</b> | <b>Frequency [%]</b> |
|-----------------|----------------------|-------------------|----------------------|
| 8008,77         | 24,08                | 100,00            | 100,0                |
| 8044,88         | 7,42                 | 100,00            | 100,0                |
| 8341,51         | 3,58                 | 100,00            | 100,0                |
| 8471,92         | 7,86                 | 100,00            | 100,0                |
| 8552,86         | 6,11                 | 100,00            | 100,0                |
| 8588,41         | 29,46                | 100,00            | 100,0                |
| 8773,61         | 3,49                 | 100,00            | 88,2                 |
| 8839,89         | 7,57                 | 100,00            | 100,0                |
| 9239,82         | 18,11                | 100,00            | 100,0                |
| 9777,92         | 4,72                 | 100,00            | 100,0                |
| 9899,71         | 22,46                | 100,00            | 100,0                |
| 9963,19         | 3,26                 | 100,00            | 100,0                |
| 10163,15        | 5,70                 | 100,00            | 100,0                |
| 10244,43        | 23,23                | 100,00            | 100,0                |
| 10284,23        | 20,54                | 100,00            | 100,0                |
| 11564,11        | 8,28                 | 100,00            | 100,0                |
| 13030,39        | 9,27                 | 100,00            | 100,0                |
| 13653,29        | 4,44                 | 100,00            | 100,0                |
| 13810,75        | 2,82                 | 100,00            | 100,0                |
